# Supplementary material
Source: PubMed Central journal article supplement (PMC3309735)
Supplement: 1200636109_pnas.201200636SI.pdf [file 1200636109_pnas.201200636SI.pdf]

# Supporting Information

Chickarmane et al. 10.1073/pnas.1200636109

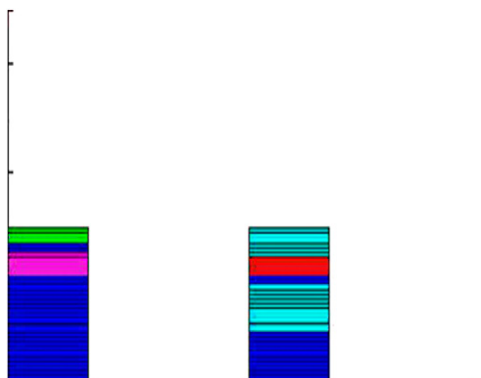

**Movie S1.** Movie of growth and division, displaying the maintenance of CLV3, WUS, Type A ARR, and Type B ARR spatial profiles, assuming all cells express cytokinin receptors.

[Movie S1](#)

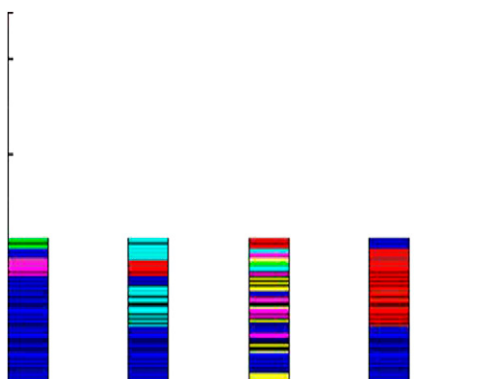

**Movie S2.** Movie of growth and division, displaying the maintenance of CLV3, WUS, Type A ARR, and Type B ARR spatial profiles, as well as tracking number of cell divisions and the receptor region, assuming a cytokinin receptor profile, which is propagated by the stochastic receptor model.

[Movie S2](#)

## Other Supporting Information Files

[SI Appendix \(PDF\)](#)
